# Supplementary material for: An integrated insight into the response of sedimentary microbial communities to heavy metal contamination
Source: PubMed Central journal article supplement (PMC4585741; doi:10.1038/srep14266), 2015-09-22
Supplement: srep14266-s1.pdf [file srep14266-s1.pdf]

**An integrated insight into the response of sedimentary microbial communities to heavy  
metal contamination (Supplementary information)**

Huaqun Yin, Jiaojiao Niu, Youhua Ren, Jing Cong, Xiaoxia Zhang, Fenliang Fan, Yunhua Xiao, Xian  
Zhang, Jie Deng, Ming Xie, Zhili He, Jizhong Zhou, Yili Liang, Xueduan Liu

Authors:

Huaqun Yin (yinhuaqun@gmail.com)

Youhua Ren (renyohua@163.com)

Jiaojiao Niu (135611006@csu.edu.cn)

Jing Cong (yqdh77@163.com)

Xiaoxia Zhang (zhangxiaoxia@caas.cn)

Fenliang Fan (fanfenliang@caas.cn)

Yunhua Xiao (huazipiaoling.123@163.com)

Xian Zhang (zixuange2010@126.com)

Jie Deng (Jiedeng@ou.edu)

Ming Xie (Ming.Xie-1@ou.edu)

Zhili He (zhili.he@ou.edu)

Jizhong Zhou (jzhou@ou.edu)

Yili Liang (liangyili@hotmail.com)

Xueduan Liu (xueduanliu@yahoo.com)

Figure S1. Detrended correspondence analysis (DCA) of sediment properties.

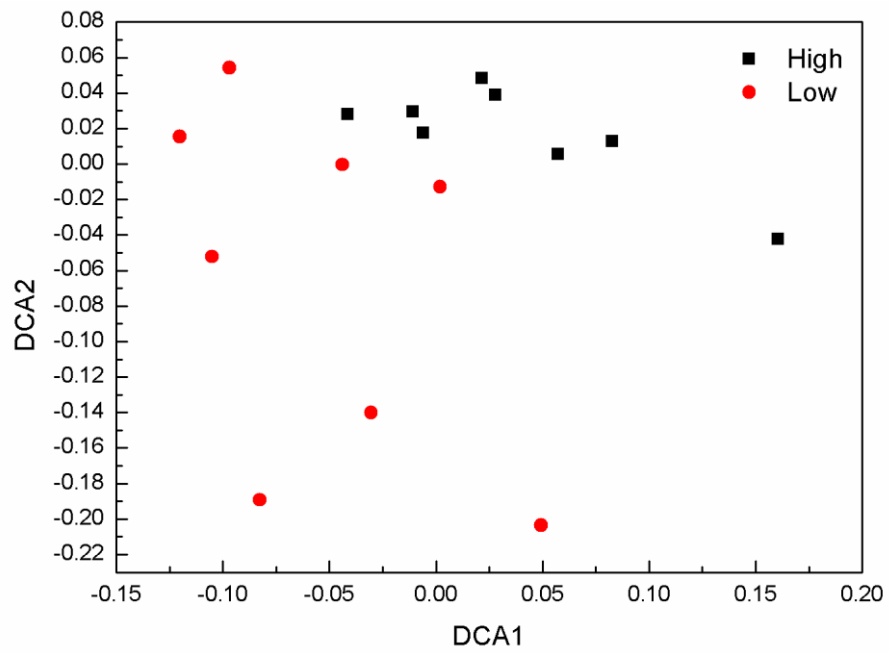

Figure S2. Rarefaction of 16S rRNA gene sequencing in each group.

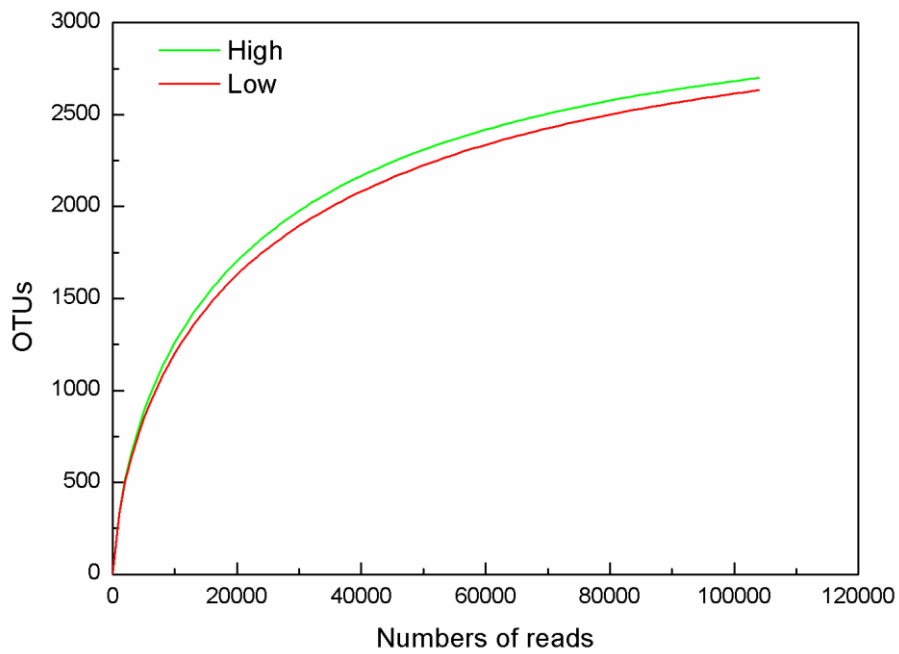

Figure S3. Percentage of each phylum in H group and L group. Only four important phyla were labeled with percentage, including *Proteobacteria*, *Firmicutes*, *Chloroflexi*, and *Actinobacteria*.

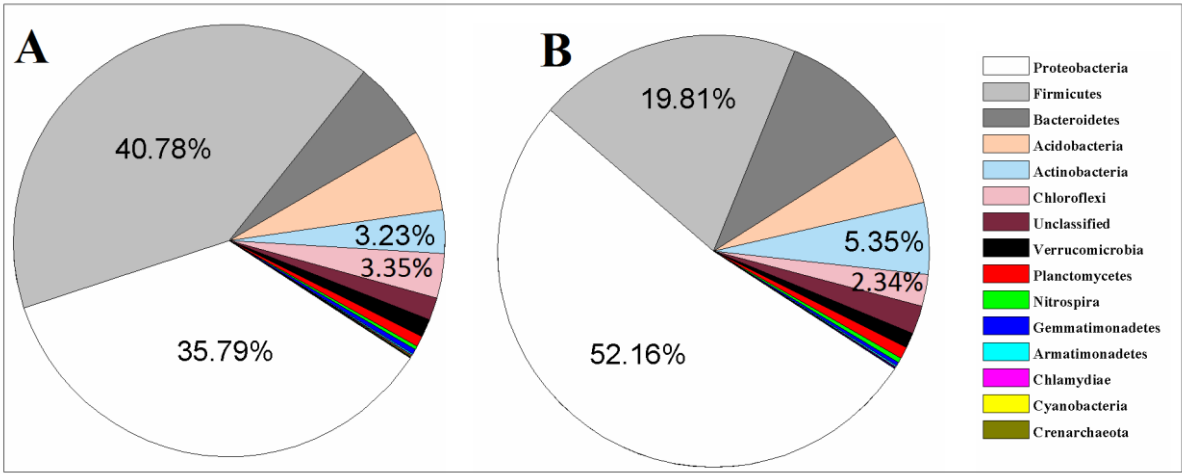

Figure S4. Scatter plots showing the fittings of the OTU connectivity distributions of the pMENs in H and L group. The x axis is the node connectivity (k). The y axis is the number of nodes under a given connectivity. The values on both axes were log transformed. Lines and  $R^2$  values show the best fit of the data to the model. (A) pMEN of H group. (B) pMEN of L group.

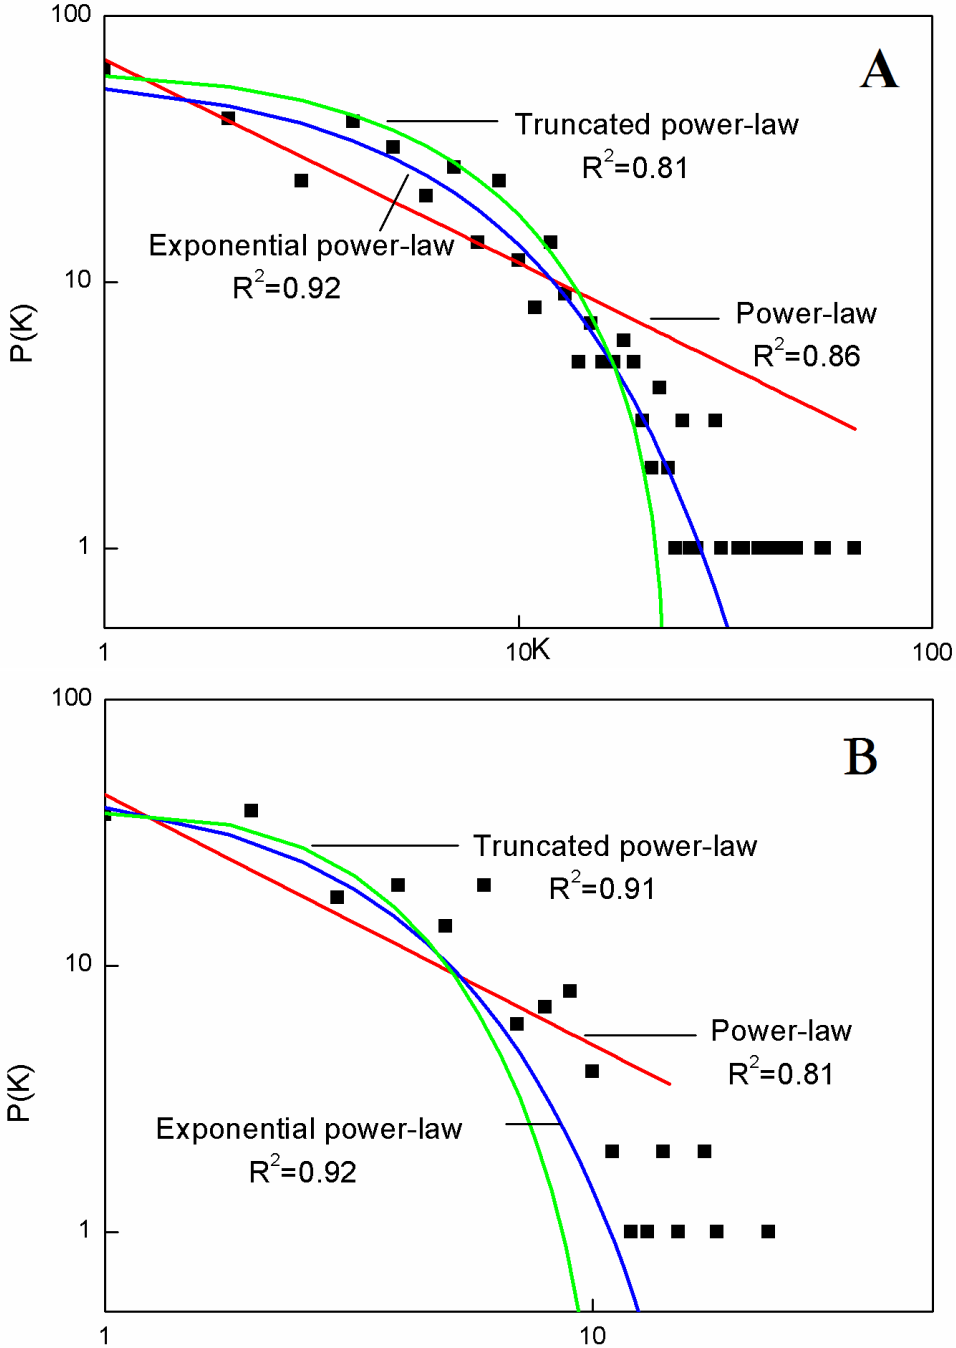

Figure S5. Modular organization of the pMENs with 16S rRNA gene-based metagenomic data. The networks were constructed by the RMT-based approach with the pyrosequencing data from H group (A) (8 samples) and L group (C) (8 samples). Colors of the nodes indicate different major phyla. Clear modular architecture was observed in this pMEN. Each node signifies an OTU which could correspond to a microbial population. Colors of the nodes indicate different major phyla. A blue line indicates a positive interaction between two individual nodes, while a red line indicates a negative interaction. The numbers indicate different modules or sub-modules determined by the fast greedy modularity optimization method. All data show that the phylogenetic MENs have a modular architecture. The sizes of individual modules are plotted in panels B (H group) and D (L group)

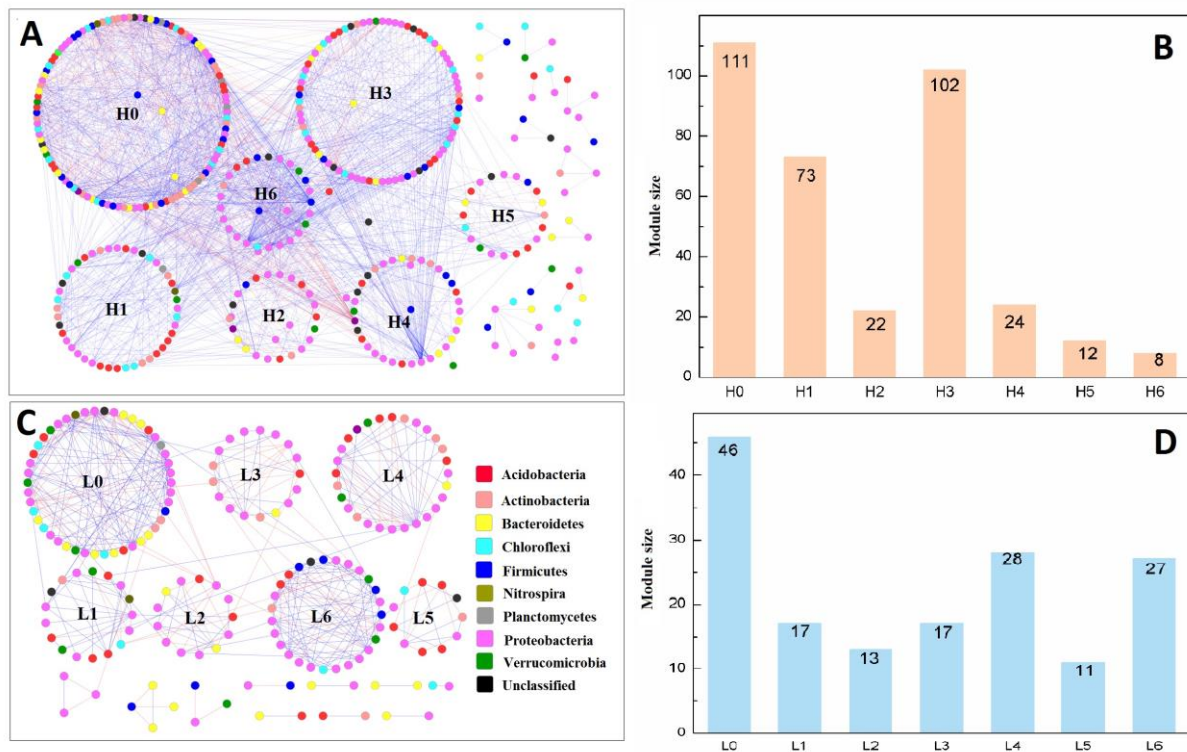

Figure S6. Example of eigengene network analysis with module E5 in H group. (A) Heat map of the standardized relative abundance (SRA) of OTUs across different samples. Rows correspond to individual OTUs in the module, whereas columns are the samples. Red corresponds to the OTUs whose SRAs are >0, and green signifies those whose SRAs are <0. (B) SRA of the corresponding eigengene across the samples. The parameter  $\Phi$  indicates the percentage of the total variance explained by the eigengene. (C) Module memberships identify groups of OTUs that consistently coexist in these microbial communities. Only 5 OTUs with significant module memberships are shown here. The values in parentheses are module memberships. (D) Module visualization showing the interactions among different OTUs within the module. Blue line, positive correlation; red line, negative correlation. The different colors of the shading of nodes represent different phylogenetic groups. (E) Mantel test of eigengenes with sediment properties of module E5.

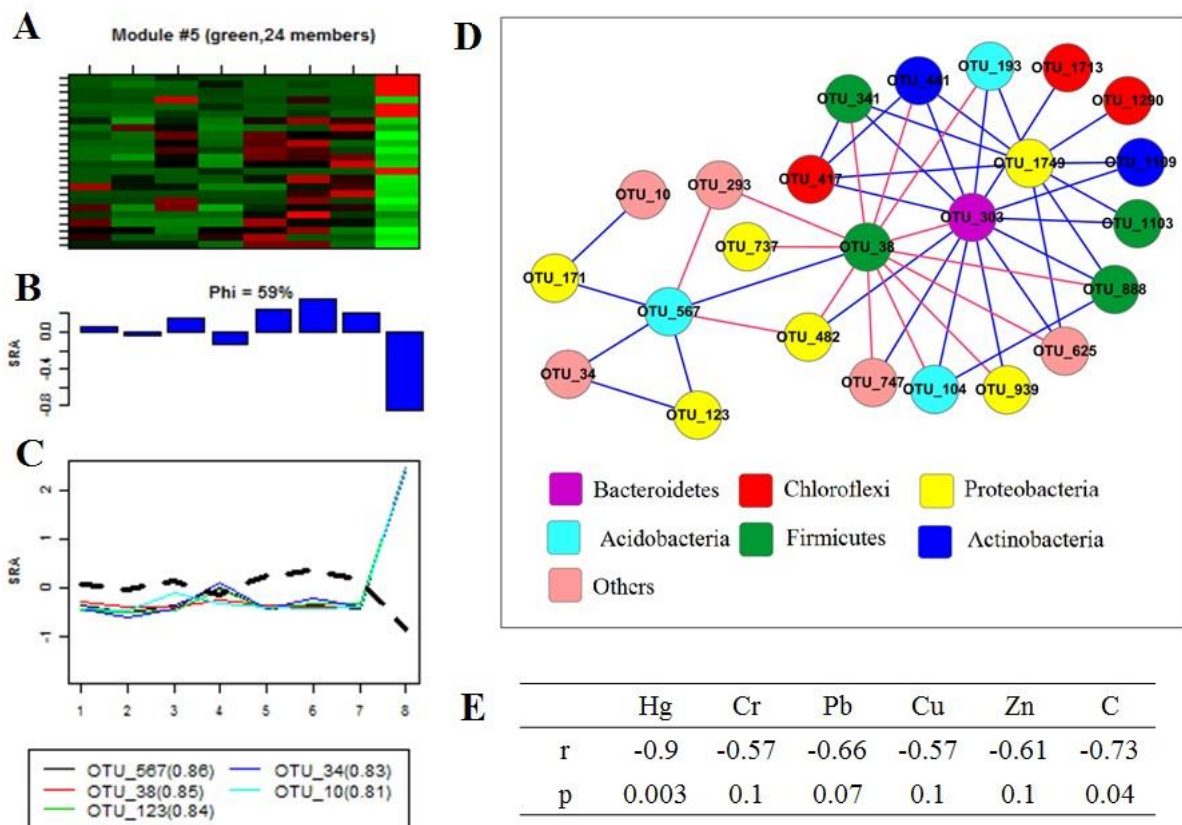

Table S1. Location and altitude of sampling sites.

| Samples | East            | North          | Altitude (m) |
|---------|-----------------|----------------|--------------|
| A1      | 112°59'40.2432" | 27°58'51.1140" | 31.3         |
| A2      | 112°59'36.9960" | 27°58'56.0568" | 37.3         |
| A3      | 112°59'36.9600" | 27°58'58.2060" | 32.7         |
| A4      | 112°59'35.4480" | 27°58'59.8008" | 30.7         |
| B1      | 112°59'26.6532" | 27°58'50.2608" | 32.7         |
| B2      | 112°59'27.6288" | 27°58'51.5532" | 28.5         |
| B3      | 112°59'27.6612" | 27°58'52.6368" | 33.5         |
| B4      | 112°59'21.9228" | 27°58'59.0700" | 35.9         |
| C1      | 112°59'26.6352" | 27°58'45.8832" | 31.3         |
| C2      | 112°59'26.1492" | 27°58'47.6472" | 28.7         |
| C3      | 112°59'25.1988" | 27°58'50.3472" | 31.7         |
| C4      | 112°59'24.9000" | 27°58'51.1788" | 27.6         |
| D1      | 112°59'12.7428" | 27°58'33.4992" | 28.1         |
| D2      | 112°59'8.4912"  | 27°58'35.6268" | 28.8         |
| D3      | 112°59'4.5240"  | 27°58'38.2800" | 29.3         |
| D4      | 112°58'56.8848" | 27°58'39.5688" | 29.5         |

Table S2. Sediment properties and ANOVA analysis between two groups.

|         | Hg           | As           | Co           | Cd    | Cr           | Ni           | Pb    | Cu           | Mn           | Zn           | N            | C           |
|---------|--------------|--------------|--------------|-------|--------------|--------------|-------|--------------|--------------|--------------|--------------|-------------|
| H1      | 0.66         | 327          | 27.9         | 22.4  | 92           | 60.3         | 151   | 78           | 1661         | 535          | 1.87         | 19.2        |
| H2      | 0.69         | 362          | 30.8         | 27.7  | 98           | 65.7         | 160   | 76           | 3204         | 627          | 1.67         | 17.4        |
| H3      | 0.69         | 204          | 18.2         | 23.9  | 88           | 49.9         | 105   | 75           | 1678         | 454          | 1.37         | 16.4        |
| H4      | 0.56         | 99           | 15.7         | 14.2  | 71           | 38.9         | 80    | 49           | 1507         | 370          | 1.13         | 13.7        |
| H5      | 0.39         | 222          | 14.9         | 12.6  | 69           | 36.2         | 81    | 53           | 1527         | 335          | 0.7          | 12.2        |
| H6      | 0.52         | 232          | 17.3         | 16.5  | 71           | 42.7         | 96    | 63           | 2026         | 398          | 1.04         | 14.7        |
| H7      | 0.52         | 138          | 14.5         | 11.1  | 57           | 31.9         | 78    | 44           | 1497         | 303          | 0.7          | 13          |
| H8      | 1.1          | 247          | 19.5         | 21.8  | 98           | 57.2         | 175   | 89           | 2593         | 607          | 1.49         | 21.6        |
| L1      | 0.51         | 84           | 17.2         | 16.5  | 75           | 44.6         | 106   | 57           | 1426         | 422          | 1.03         | 13.5        |
| L2      | 0.15         | 62           | 8.2          | 3.3   | 46           | 19.3         | 94    | 34           | 1306         | 238          | 0.13         | 4.66        |
| L3      | 0.17         | 33           | 6.5          | 1.6   | 36           | 14.4         | 77    | 27           | 700          | 179          | 0.05         | 2.58        |
| L4      | 0.65         | 104          | 19.3         | 28.2  | 89           | 52.5         | 136   | 81           | 2473         | 544          | 1.17         | 13.5        |
| L5      | 0.18         | 71           | 10.3         | 0.6   | 57           | 28.7         | 68    | 31           | 536          | 124          | 0.63         | 9.15        |
| L6      | 0.24         | 113          | 12.6         | 6.9   | 57           | 32           | 66    | 37           | 1124         | 212          | 0.77         | 8.35        |
| L7      | 0.16         | 66           | 12.6         | 2.7   | 56           | 31.4         | 152   | 38           | 890          | 177          | 0.94         | 12.5        |
| L8      | 0.14         | 42           | 12.7         | 1.8   | 57           | 28.7         | 47    | 29           | 604          | 120          | 0.94         | 12.5        |
| P value | <b>0.006</b> | <b>0.004</b> | <b>0.028</b> | 0.061 | <b>0.032</b> | <b>0.032</b> | 0.248 | <b>0.039</b> | <b>0.026</b> | <b>0.033</b> | <b>0.035</b> | <b>0.01</b> |

\*All values are in ppm.

\*Significant differences (P<0.05) are indicated in bold.



Table S3(a). Alpha diversity of 16S rDNA sequencing data and dissimilarity test between two groups

| Gene | Alpha diversity |                 | Dissimilarity test |              |
|------|-----------------|-----------------|--------------------|--------------|
|      | Shannon Index   | Pielou evenness | Mean distance      | Significance |
| High | 10.0415475      | 0.999380625     | 0.131              | 0.107        |
| Low  | 10.06584        | 0.999376838     |                    |              |

Table S3(b). Alpha diversity of GeoChip data and dissimilarity test between two groups

| OTU  | Alpha diversity |                 | Dissimilarity test |              |
|------|-----------------|-----------------|--------------------|--------------|
|      | Shannon Index   | Pielou evenness | Mean distance      | Significance |
| High | 4.2267795       | 0.621360063     | 0.537              | 0.0509       |
| Low  | 4.14525925      | 0.6416976       |                    |              |

Table S4. Mantel test of 16S rDNA sequencing data with sediment properties.

| Phylum              | Hg           | As           | Cd           | Cr           | Cu           | Mn           | Zn           | TN           | TC           |
|---------------------|--------------|--------------|--------------|--------------|--------------|--------------|--------------|--------------|--------------|
| Whole               | <b>0.019</b> | 0.09         | <b>0.02</b>  | 0.119        | <b>0.028</b> | <b>0.023</b> | <b>0.007</b> | 0.429        | 0.139        |
| Actinobacteria      | 0.111        | 0.219        | <b>0.019</b> | 0.327        | 0.101        | 0.068        | <b>0.021</b> | 0.275        | 0.22         |
| Chlorobi            | 0.182        | <b>0.018</b> | 0.295        | 0.443        | 0.151        | 0.326        | 0.362        | 0.498        | 0.449        |
| Deinococcus-Thermus | 0.312        | 0.219        | 0.222        | <b>0.01</b>  | 0.163        | 0.384        | 0.481        | <b>0.005</b> | <b>0.002</b> |
| Firmicutes          | <b>0.034</b> | <b>0.034</b> | <b>0.016</b> | 0.086        | <b>0.033</b> | <b>0.011</b> | <b>0.01</b>  | 0.276        | 0.207        |
| Nitrospira          | 0.272        | 0.197        | 0.316        | <b>0.031</b> | 0.14         | 0.37         | 0.434        | <b>0.033</b> | <b>0.022</b> |
| Planctomycetes      | 0.476        | 0.267        | 0.09         | <b>0.007</b> | 0.144        | 0.113        | 0.266        | <b>0.027</b> | <b>0.016</b> |
| Proteobacteria      | <b>0.023</b> | 0.41         | <b>0.03</b>  | 0.169        | <b>0.036</b> | 0.101        | <b>0.018</b> | 0.657        | 0.181        |
| Verrucomicrobia     | 0.36         | 0.554        | <b>0.047</b> | 0.062        | 0.134        | 0.139        | 0.155        | 0.101        | 0.064        |
| WS3                 | 0.084        | <b>0.021</b> | 0.433        | 0.3          | 0.161        | 0.072        | 0.146        | 0.461        | 0.304        |

\*Abbreviations: TN, total nitrogen; TC, total carbon.

\*Significant differences (P<0.05) are indicated in bold.

Table S5. Difference of functional gene in each group as examined by dissimilarity test.

|           | Distance | Significance  |
|-----------|----------|---------------|
| carbon    | 46.774   | <b>0.0529</b> |
| nitrogen  | 25.336   | <b>0.0539</b> |
| metal     | 18.944   | <b>0.0619</b> |
| phosphrus | 14.275   | <b>0.0589</b> |
| sulfure   | 21.126   | <b>0.0529</b> |
| organic   | 31.745   | <b>0.0699</b> |
| secondary | 3.044    | 0.592         |
| virulence | 8.753    | 0.108         |

\*Significant differences ( $P < 0.05$ ) are indicated in bold.

Table S6(a). Normalized gene intensity and category of genes significantly more abundant in H group.

| High     | Low      | p value | Gene                      | Gene_category       | Subcategory1             | Subcategory2                                |
|----------|----------|---------|---------------------------|---------------------|--------------------------|---------------------------------------------|
| 82.61491 | 78.19641 | **      | limeh                     | Carbon Cycling      | Carbon degradation       | Terpenes                                    |
| 151.2909 | 147.7333 | **      | ccmL                      | Carbon Cycling      | Carbon fixation          | Bacterial Microcompartments                 |
| 124.8928 | 121.5991 | **      | FBP_aldolase              | Carbon Cycling      | Carbon degradation       | Pectin                                      |
| 33.40419 | 30.53041 | **      | alpha_galactosidase_fungi | Carbon Cycling      | Carbon degradation       | Other                                       |
| 159.5686 | 157.4446 | **      | vana                      | Carbon Cycling      | Carbon degradation       | Vanillin/Lignin                             |
| 249.1995 | 247.2205 | **      | cutinase                  | Carbon Cycling      | Carbon degradation       | Cutin                                       |
| 6.986259 | 5.613651 | **      | lmo                       | Carbon Cycling      | Carbon degradation       | Terpenes                                    |
| 5.915004 | 4.668454 | **      | ccmN                      | Carbon Cycling      | Carbon fixation          | Bacterial Microcompartments                 |
| 71.28013 | 70.6639  | *       | protease_serine_fungi     | Carbon Cycling      | Carbon degradation       | protein                                     |
| 3.146143 | 2.753303 | **      | mcl                       | Carbon Cycling      | Carbon fixation          | 3-hydroxypropionate bicycle                 |
| 1.08186  | 0.765011 | *       | C_CoA_hydratase           | Carbon Cycling      | Carbon fixation          | 3-hydroxypropionate/4-hydroxybutyrate cycle |
| 215.4075 | 215.1466 | **      | TIM                       | Carbon Cycling      | Carbon fixation          | Calvin cycle                                |
| 3.601192 | 3.550444 | *       | 4hbcd_dic4hb              | Carbon Cycling      | Carbon fixation          | Dicarboxylate/4-hydroxybutyrate cycle       |
| 9.848407 | 9.821527 | **      | PEPC                      | Carbon Cycling      | Carbon fixation          | Dicarboxylate/4-hydroxybutyrate cycle       |
| 2.924859 | 2.900958 | **      | lipase_fungi              | Carbon Cycling      | Carbon degradation       | Lipids                                      |
| 2.700552 | 2.67896  | **      | fumarase_3HP4HB           | Carbon Cycling      | Carbon fixation          | Reductive acetyl-CoA pathway                |
| 2.633423 | 2.613423 | **      | mcr                       | Carbon Cycling      | Carbon fixation          | 3-hydroxypropionate bicycle                 |
| 1.544033 | 1.529435 | **      | mct                       | Carbon Cycling      | Carbon fixation          | 3-hydroxypropionate bicycle                 |
| 2.028495 | 2.018401 | **      | 4hbcd                     | Carbon Cycling      | Carbon fixation          | 3-hydroxypropionate/4-hydroxybutyrate cycle |
| 5.058804 | 5.051935 | **      | suc_CoA_red_DiC4HB        | Carbon Cycling      | Carbon fixation          | Dicarboxylate/4-hydroxybutyrate cycle       |
| 1.120328 | 1.119081 | **      | sdhA                      | Carbon Cycling      | Carbon fixation          | 3-hydroxypropionate bicycle                 |
| 29.00072 | 27.74852 | *       | chr                       | Metal Homeostasis   | Chromium                 | Detoxification                              |
| 15.349   | 14.68666 | *       | metc                      | Metal Homeostasis   | Mercury                  | Detoxification                              |
| 71.66029 | 71.41566 | **      | merb                      | Metal Homeostasis   | Mercury                  | Detoxification                              |
| 1.236746 | 1.23331  | **      | silaffin                  | Metal Homeostasis   | Silicon                  | Biosynthesis                                |
| 729.3642 | 724.39   | **      | narg                      | Nitrogen            | Denitrification          | NA                                          |
| 403.6078 | 399.9004 | **      | urec                      | Nitrogen            | Ammonification           | NA                                          |
| 96.3308  | 95.81379 | **      | nasa                      | Nitrogen            | Assimilatory N reduction | NA                                          |
| 167.3765 | 163.5685 | *       | badh                      | Organic Remediation | Aromatics                | Other aromatics                             |
| 14.846   | 12.77264 | **      | xyll                      | Organic Remediation | Aromatics                | Aromatic carboxylic acid                    |
| 48.32891 | 46.61159 | **      | bend                      | Organic Remediation | Aromatics                | Aromatic carboxylic acid                    |
| 114.5375 | 113.0018 | **      | nhh                       | Organic Remediation | Aromatics                | Nitroaromatics                              |
| 242.021  | 240.7758 | **      | poba                      | Organic Remediation | Aromatics                | Aromatic carboxylic acid                    |
| 142.3664 | 141.177  | **      | cmci                      | Organic Remediation | Aromatics                | Other aromatics                             |
| 20.75604 | 19.64767 | *       | chnd                      | Organic Remediation | Other Hydrocarbons       | NA                                          |
| 18.75319 | 17.75345 | *       | pchcf                     | Organic Remediation | Aromatics                | BTEX and related aromatics                  |
| 12.71203 | 11.75408 | **      | nahf                      | Organic Remediation | Aromatics                | Polycyclic aromatics                        |
| 4.794441 | 4.038268 | *       | msad                      | Organic Remediation | Others                   | NA                                          |
| 2.879194 | 2.225463 | *       | cbaa                      | Organic Remediation | Aromatics                | Chlorinated aromatics                       |
| 88.18014 | 87.60819 | *       | one_ring_12diox           | Organic Remediation | Aromatics                | Other aromatics                             |
| 0.804356 | 0.336862 | *       | dbdc                      | Organic Remediation | Aromatics                | Heterocyclic aromatics                      |

|          |          |    |                  |                     |                  |                            |
|----------|----------|----|------------------|---------------------|------------------|----------------------------|
| 1.092286 | 0.667919 | *  | nahc_2           | Organic Remediation | Aromatics        | Polycyclic aromatics       |
| 45.62803 | 45.40861 | *  | nfsa_2           | Organic Remediation | Aromatics        | Nitroaromatics             |
| 13.59835 | 13.5385  | ** | bco              | Organic Remediation | Aromatics        | Aromatic carboxylic acid   |
| 99.58326 | 99.53223 | ** | mult_ring_12DiOx | Organic Remediation | Aromatics        | Other aromatics            |
| 4.02189  | 3.978148 | ** | bbs              | Organic Remediation | Aromatics        | BTEX and related aromatics |
| 2.816317 | 2.774689 | ** | mhqa             | Organic Remediation | Aromatics        | Nitroaromatics             |
| 2.718511 | 2.681181 | ** | nbzc             | Organic Remediation | Aromatics        | Nitroaromatics             |
| 3.775855 | 3.753185 | ** | bbsg             | Organic Remediation | Aromatics        | BTEX and related aromatics |
| 2.649245 | 2.631612 | ** | cdo              | Organic Remediation | Aromatics        | Other aromatics            |
| 1.145989 | 1.137885 | ** | nbza             | Organic Remediation | Aromatics        | Nitroaromatics             |
| 2.554149 | 2.547293 | ** | nbzb             | Organic Remediation | Aromatics        | Nitroaromatics             |
| 178.4118 | 175.6465 | ** | soxY             | Sulfur              | Sulfur Oxidation | NA                         |
| 282.1989 | 280.7127 | ** | cysJ             | Sulfur              | Reduction        | NA                         |

Table S6(b). Normalized gene intensity and category of genes significantly less abundant in H group.

| High     | Low      | p value | Gene                      | Gene_category       | Subcategory1             | Subcategory2                          |
|----------|----------|---------|---------------------------|---------------------|--------------------------|---------------------------------------|
| 1.179592 | 1.214678 | *       | dextranase_fungi          | Carbon Cycling      | Carbon degradation       | sucrose                               |
| 43.04822 | 43.10139 | **      | mnp                       | Carbon Cycling      | Carbon degradation       | Lignin                                |
| 3.672285 | 3.746374 | **      | ccl                       | Carbon Cycling      | Carbon fixation          | Reductive tricarboxylic acid cycle    |
| 8.169744 | 8.265637 | *       | sucA_DiC4HB               | Carbon Cycling      | Carbon fixation          | Dicarboxylate/4-hydroxybutyrate cycle |
| 177.4958 | 177.6416 | *       | endoglucanase             | Carbon Cycling      | Carbon degradation       | Chitin                                |
| 7.336763 | 7.583725 | **      | oorA                      | Carbon Cycling      | Carbon fixation          | Reductive tricarboxylic acid cycle    |
| 23.38332 | 24.08689 | **      | mmox                      | Carbon Cycling      | Methane                  | Methane oxidation                     |
| 432.225  | 433.3116 | **      | tktA                      | Carbon Cycling      | Carbon fixation          | Calvin cycle                          |
| 17.36115 | 18.50949 | *       | Glucose_oxidase_fungi     | Carbon Cycling      | Carbon degradation       | glucose                               |
| 15.18694 | 16.64461 | **      | chitin_deacetylase_fungi  | Carbon Cycling      | Carbon degradation       | Chitin                                |
| 131.9039 | 133.8049 | **      | glucoamylase              | Carbon Cycling      | Carbon degradation       | Starch                                |
| 47.27027 | 49.23928 | **      | exopolysaccharonase_fungi | Carbon Cycling      | Carbon degradation       | Cellulose                             |
| 313.395  | 315.6831 | **      | cellobiase                | Carbon Cycling      | Carbon degradation       | Cellulose                             |
| 94.97057 | 97.69419 | **      | pula                      | Carbon Cycling      | Carbon degradation       | Starch                                |
| 242.8304 | 246.1505 | **      | GAPDH_Calvin              | Carbon Cycling      | Carbon fixation          | Calvin cycle                          |
| 623.4501 | 629.7217 | *       | chitinase                 | Carbon Cycling      | Carbon degradation       | Chitin                                |
| 302.2232 | 312.5634 | **      | phenol_oxidase            | Carbon Cycling      | Carbon degradation       | Lignin                                |
| 12.41665 | 12.96206 | **      | silicon_transporter       | Metal Homeostasis   | Silicon                  | Transport                             |
| 9.168263 | 9.236702 | **      | hzo                       | Nitrogen            | Anammox                  | NA                                    |
| 339.3049 | 339.8729 | **      | nirs                      | Nitrogen            | Denitrification          | NA                                    |
| 38.87932 | 39.51393 | **      | narb                      | Nitrogen            | Assimilatory N reduction | NA                                    |
| 25.59453 | 27.87074 | **      | hao                       | Nitrogen            | Nitrification            | NA                                    |
| 558.6419 | 580.1362 | **      | nifh                      | Nitrogen            | Nitrogen fixation        | NA                                    |
| 52.90932 | 52.93365 | **      | amie                      | Organic Remediation | Aromatics                | Other aromatics                       |
| 2.618172 | 2.647529 | **      | onr                       | Organic Remediation | Others                   | NA                                    |
| 9.884595 | 9.934663 | **      | alkj                      | Organic Remediation | Other Hydrocarbons       | NA                                    |
| 10.09031 | 10.19036 | **      | chnc                      | Organic Remediation | Other Hydrocarbons       | NA                                    |

|          |          |    |                       |                     |                             |                          |
|----------|----------|----|-----------------------|---------------------|-----------------------------|--------------------------|
| 7.622455 | 7.754502 | ** | mauab                 | Organic Remediation | Herbicides related compound | NA                       |
| 116.3534 | 116.4891 | ** | xylg                  | Organic Remediation | Aromatics                   | Aromatic carboxylic acid |
| 53.58515 | 53.73191 | *  | p450aro               | Organic Remediation | Aromatics                   | polycyclic aromatics     |
| 3.933702 | 4.085466 | ** | nahb                  | Organic Remediation | Aromatics                   | Polycyclic aromatics     |
| 5.153194 | 5.402347 | *  | msmabcd               | Organic Remediation | Others                      | NA                       |
| 12.18295 | 12.46649 | *  | scnabc                | Organic Remediation | Others                      | NA                       |
| 10.22258 | 10.52724 | *  | phdk                  | Organic Remediation | Polycyclic aromatics        | NA                       |
| 62.30123 | 62.61557 | ** | mhpa                  | Organic Remediation | Aromatics                   | Aromatic carboxylic acid |
| 1.222383 | 1.633192 | ** | thmAB                 | Organic Remediation | Others                      | NA                       |
| 3.933827 | 4.577882 | ** | cpne                  | Organic Remediation | Other Hydrocarbons          | NA                       |
| 13.29744 | 13.99033 | *  | cara                  | Organic Remediation | Aromatics                   | Heterocyclic aromatics   |
| 14.72722 | 15.47769 | ** | phta                  | Organic Remediation | Aromatics                   | Aromatic carboxylic acid |
| 80.8987  | 81.75181 | ** | atza                  | Organic Remediation | Herbicides related compound | NA                       |
| 83.49629 | 84.51716 | ** | nagg                  | Organic Remediation | Aromatics                   | Aromatic carboxylic acid |
| 6.900089 | 7.952006 | ** | cpnc                  | Organic Remediation | Other Hydrocarbons          | NA                       |
| 56.73122 | 58.27488 | *  | linc                  | Organic Remediation | Pesticides related compound | NA                       |
| 149.4188 | 151.3722 | ** | arylest               | Organic Remediation | Aromatics                   | Other aromatics          |
| 105.0694 | 108.7868 | ** | bphc                  | Organic Remediation | Aromatics                   | Polycyclic aromatics     |
| 172.9551 | 178.1853 | ** | pcag                  | Organic Remediation | Aromatics                   | Other aromatics          |
| 280.3449 | 285.2487 | ** | ppk                   | Phosphorus          | Polyphosphate synthesis     | NA                       |
| 422.1715 | 429.5132 | *  | dsrB                  | Sulfur              | sulfite reduction           | NA                       |
| 563.3559 | 574.2286 | ** | dsra                  | Sulfur              | sulfite reduction           | NA                       |
| 121.0414 | 121.1585 | *  | ben_bcla              | virulence           | NA                          | NA                       |
| 3.236346 | 3.374337 | ** | fosx                  | Virulence           | Antibiotic resistance       | Degradation              |
| 28.48364 | 33.44597 | ** | phospholipase_B_fungi | virulence           | degradation                 | NA                       |

---

\*Only Significant differences (P<0.1) are showed. \*p<0.1, \*\*p<0.05

Table S7. Mantel test of Geochip data with environmental attributes.

| Gene                  | As           | Co           | Cd           | Cr           | Ni           | Pb           | Cu           | Mn           | Zn           | N            | C            |
|-----------------------|--------------|--------------|--------------|--------------|--------------|--------------|--------------|--------------|--------------|--------------|--------------|
| Whole                 | 0.173        | <b>0.027</b> | <b>0.013</b> | <b>0.029</b> | <b>0.022</b> | 0.604        | 0.075        | <b>0.018</b> | <b>0.022</b> | 0.061        | 0.157        |
| FBP_aldolase          | 0.079        | <b>0.006</b> | <b>0.02</b>  | <b>0.034</b> | <b>0.025</b> | 0.381        | 0.1          | <b>0.005</b> | <b>0.028</b> | 0.071        | 0.151        |
| SoxA                  | 0.207        | 0.059        | <b>0.018</b> | <b>0.032</b> | <b>0.047</b> | 0.631        | 0.15         | <b>0.049</b> | <b>0.045</b> | 0.141        | 0.141        |
| SoxB                  | 0.103        | <b>0.02</b>  | <b>0.007</b> | <b>0.018</b> | <b>0.012</b> | 0.496        | 0.057        | <b>0.005</b> | <b>0.021</b> | 0.088        | 0.172        |
| SoxC                  | 0.428        | 0.067        | <b>0.015</b> | <b>0.001</b> | <b>0.009</b> | 0.621        | <b>0.043</b> | 0.125        | 0.108        | <b>0.014</b> | <b>0.017</b> |
| SoxV                  | 0.071        | <b>0.024</b> | <b>0.037</b> | <b>0.015</b> | <b>0.013</b> | 0.588        | 0.116        | <b>0.01</b>  | <b>0.05</b>  | 0.059        | 0.085        |
| acetylglucosaminidase | 0.094        | <b>0.038</b> | <b>0.02</b>  | <b>0.044</b> | <b>0.038</b> | 0.517        | 0.1          | <b>0.01</b>  | <b>0.022</b> | 0.129        | 0.186        |
| alkb                  | 0.184        | 0.061        | <b>0.019</b> | <b>0.012</b> | <b>0.015</b> | 0.707        | 0.08         | <b>0.049</b> | 0.053        | <b>0.049</b> | 0.13         |
| aoxb                  | 0.231        | <b>0.019</b> | <b>0.004</b> | <b>0.017</b> | <b>0.01</b>  | 0.504        | <b>0.043</b> | <b>0.02</b>  | <b>0.01</b>  | 0.056        | 0.054        |
| arra                  | 0.407        | 0.084        | <b>0.048</b> | <b>0.023</b> | <b>0.033</b> | 0.9          | 0.168        | 0.117        | 0.132        | 0.057        | 0.101        |
| arsc                  | 0.243        | 0.055        | <b>0.031</b> | <b>0.036</b> | <b>0.034</b> | 0.714        | 0.156        | <b>0.045</b> | 0.072        | 0.101        | 0.209        |
| arism                 | 0.428        | 0.161        | <b>0.01</b>  | 0.064        | 0.106        | 0.676        | 0.164        | <b>0.025</b> | 0.083        | 0.324        | 0.356        |
| arylest               | 0.122        | <b>0.015</b> | <b>0.013</b> | <b>0.013</b> | <b>0.011</b> | 0.712        | 0.058        | <b>0.046</b> | <b>0.032</b> | <b>0.043</b> | 0.129        |
| cueo                  | 0.059        | <b>0.011</b> | <b>0.006</b> | <b>0.02</b>  | <b>0.02</b>  | 0.705        | 0.081        | <b>0.015</b> | <b>0.02</b>  | 0.063        | 0.169        |
| dsrB                  | 0.117        | <b>0.03</b>  | <b>0.009</b> | <b>0.023</b> | <b>0.007</b> | 0.695        | 0.087        | <b>0.039</b> | <b>0.036</b> | 0.085        | 0.164        |
| dsra                  | 0.146        | <b>0.027</b> | <b>0.028</b> | <b>0.017</b> | <b>0.015</b> | 0.632        | 0.061        | <b>0.014</b> | <b>0.027</b> | <b>0.049</b> | 0.084        |
| metc                  | <b>0.038</b> | <b>0.017</b> | <b>0.047</b> | 0.126        | 0.052        | <b>0.017</b> | 0.076        | <b>0.005</b> | <b>0.032</b> | 0.074        | 0.255        |
| nirk                  | 0.153        | <b>0.039</b> | <b>0.017</b> | <b>0.034</b> | <b>0.029</b> | 0.714        | 0.131        | <b>0.021</b> | <b>0.022</b> | 0.14         | 0.311        |
| nirs                  | 0.167        | 0.057        | <b>0.019</b> | <b>0.03</b>  | <b>0.036</b> | 0.624        | 0.1          | <b>0.02</b>  | <b>0.031</b> | 0.116        | 0.223        |
| ppk                   | 0.147        | <b>0.017</b> | <b>0.013</b> | <b>0.02</b>  | <b>0.028</b> | 0.508        | 0.068        | <b>0.023</b> | <b>0.018</b> | 0.058        | 0.139        |
| ppx                   | 0.126        | <b>0.025</b> | <b>0.013</b> | <b>0.034</b> | <b>0.015</b> | 0.523        | 0.083        | <b>0.015</b> | <b>0.025</b> | 0.071        | 0.169        |
| silicon_transporter   | 0.088        | <b>0.037</b> | <b>0.008</b> | <b>0.014</b> | <b>0.015</b> | 0.652        | <b>0.033</b> | <b>0.03</b>  | <b>0.019</b> | <b>0.034</b> | <b>0.023</b> |
| soxY                  | 0.228        | <b>0.049</b> | <b>0.01</b>  | <b>0.017</b> | <b>0.018</b> | 0.597        | 0.081        | <b>0.03</b>  | 0.051        | 0.081        | 0.138        |
| tehb                  | 0.387        | 0.078        | <b>0.036</b> | <b>0.05</b>  | 0.069        | 0.623        | 0.204        | 0.058        | 0.073        | 0.18         | 0.374        |

\*Significant differences (P<0.05) are indicated in bold.
